# Supplementary material
Source: PubMed Central journal article supplement (PMC10841602)
Supplement: NIHMS1947859-supplement-13.pdf [file NIHMS1947859-supplement-13.pdf]

**Table S6.** Enrichment of MAP3K4 and DDIAS peptides across various genome-wide screens related to Figure 6.

|                        | DDIAS Peptide 9              | DDIAS Peptide 10          | MAP3K4 Peptide 19             | MAP3K4 Peptide 18                              |
|------------------------|------------------------------|---------------------------|-------------------------------|------------------------------------------------|
| 4A only                | N/A                          | N/A                       | Rank=1 , FE=43.53, P=5.00E-08 | Rank=19, Pctl.≈ 0.007th ,FE= 2.94, P=3.71E-05  |
| 4A,7A,7G,9B 10C pool   | N/A                          | N/A                       | Rank=1, FE=25.25, P=5.00E-08  | Rank= 801, Pctl. ≈ 0.308%,FE= 1.51, P=0.020261 |
| 3A,10A1,10E,10F pool   | Rank=1, FE=31.55, P=5.00E-08 | Rank=7, FE=1.9, P=4.9E-04 | N/A                           | N/A                                            |
| 3A,4A,4B,5B,8E,8F pool | Rank=1, FE=60.75, P=1E-06    | Rank=4, FE=7.06, P=1E-06  | Rank=1, FE=15.69, P=1E-06     | Rank= 180 , Pctl ≈ 0.069%,FE=2.8,P=1.9E-05     |

FE= fold enrichment, Pctl= Percentile (Pctl.), Rank =Ranking of peptide out of 259,354 fragments, P= P-value
