# Supplementary material
Source: PubMed Central journal article supplement (PMC10841602)

# Supplemental Figure 1

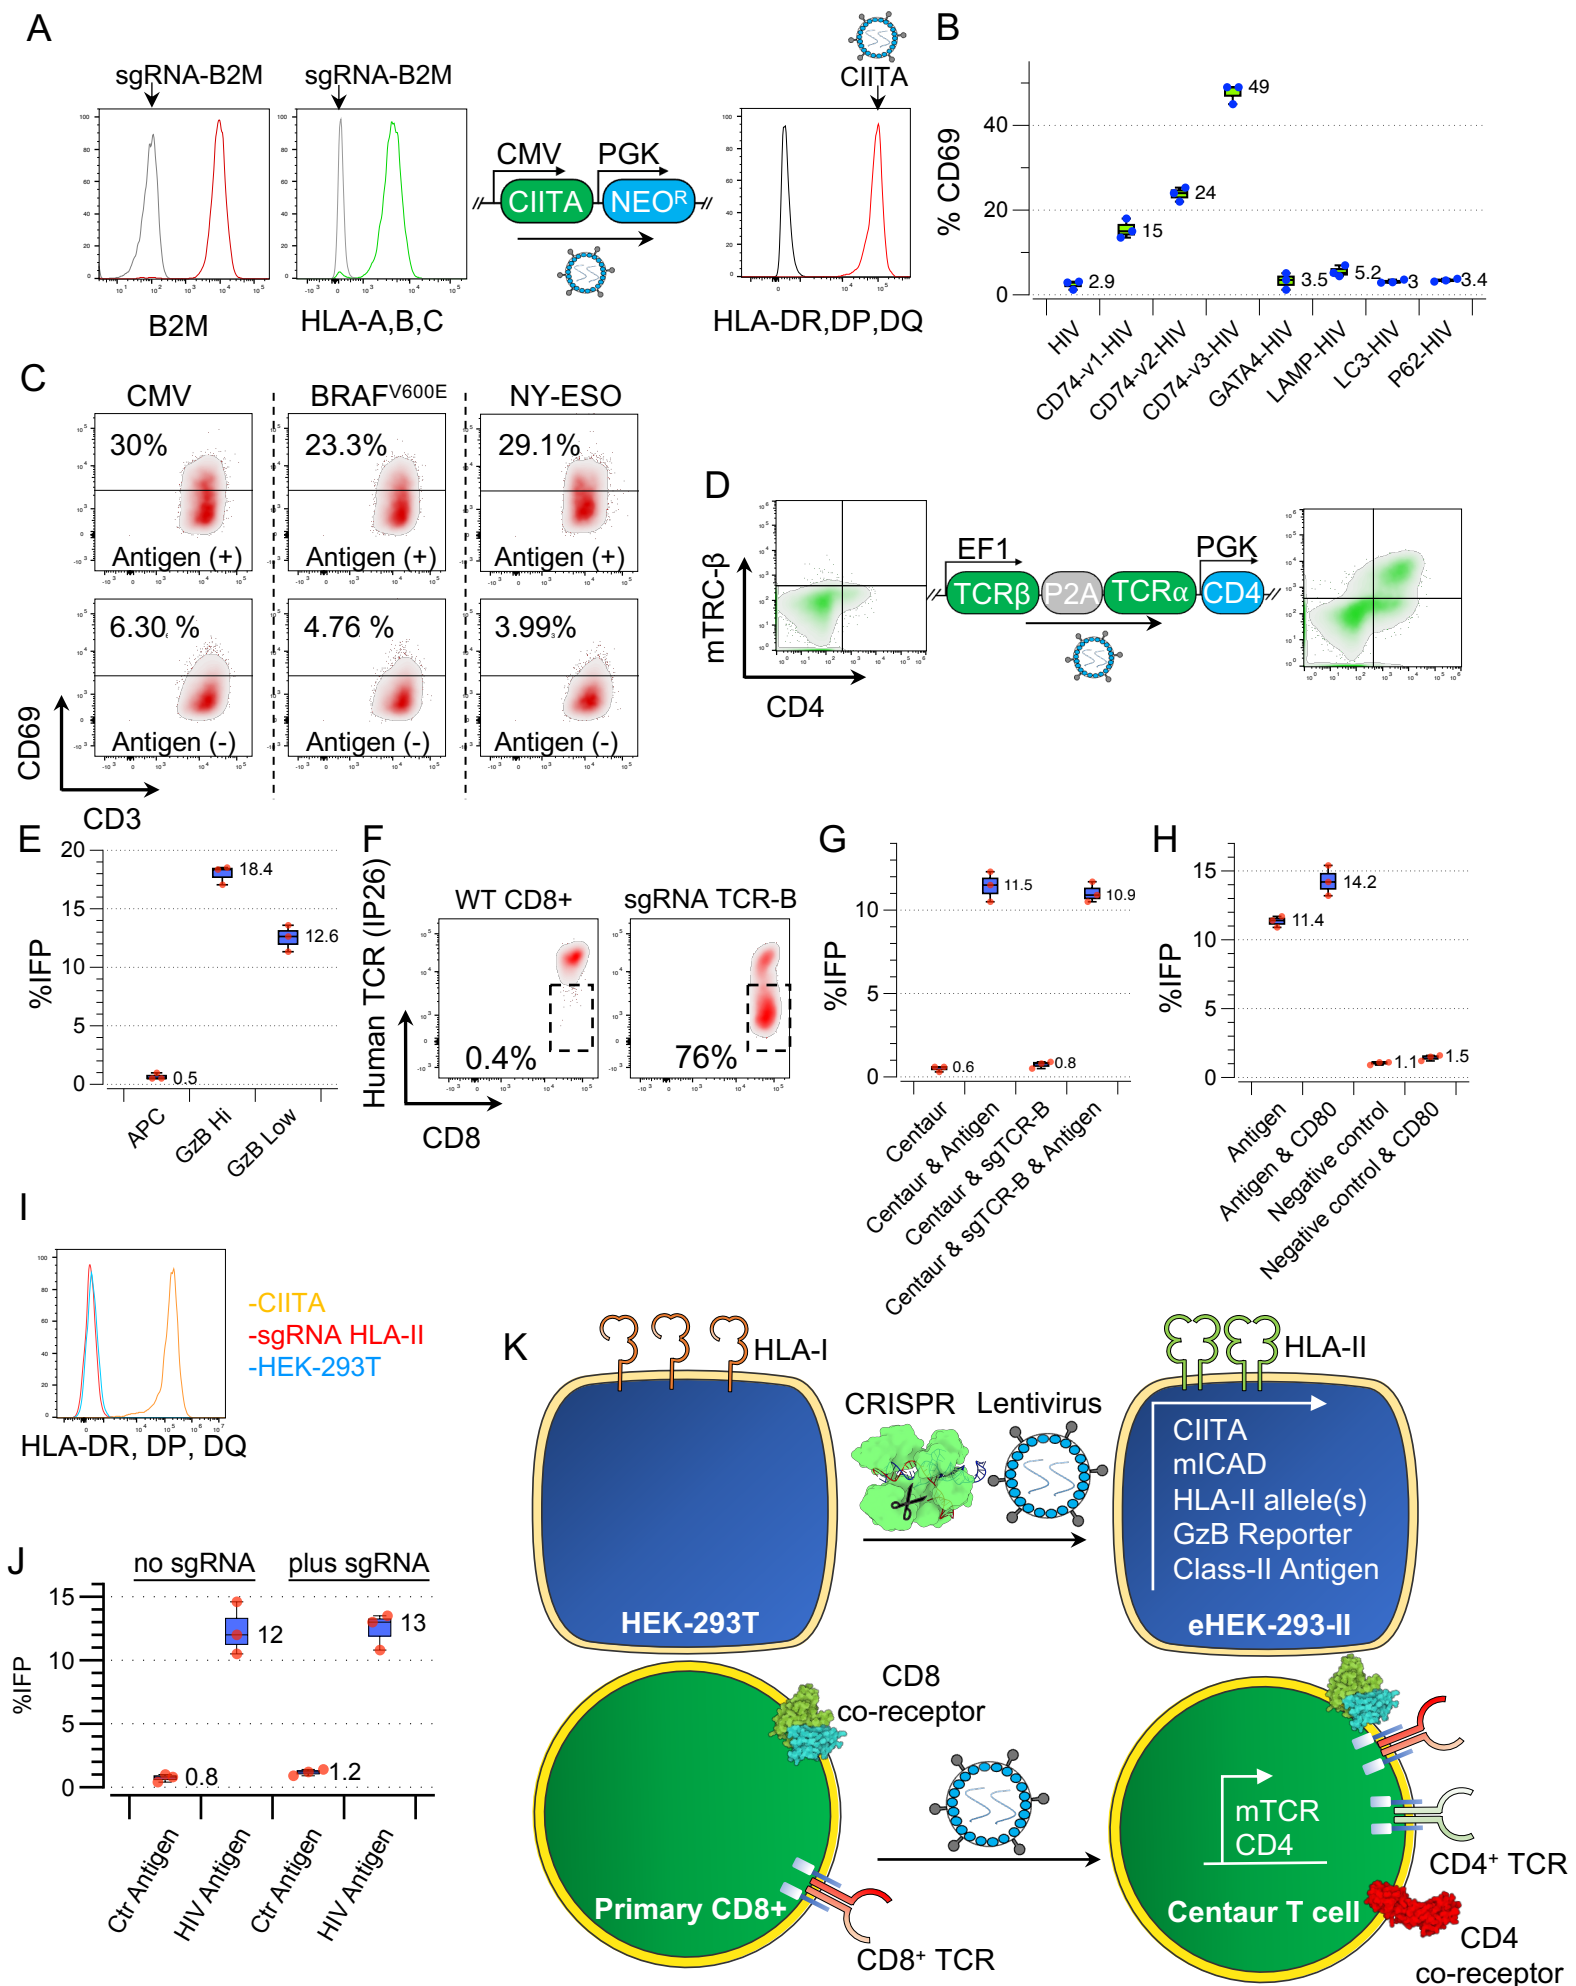

Supplement: NIHMS1947859-supplement-1.pdf [file NIHMS1947859-supplement-1.pdf]

# Supplemental Figure 2

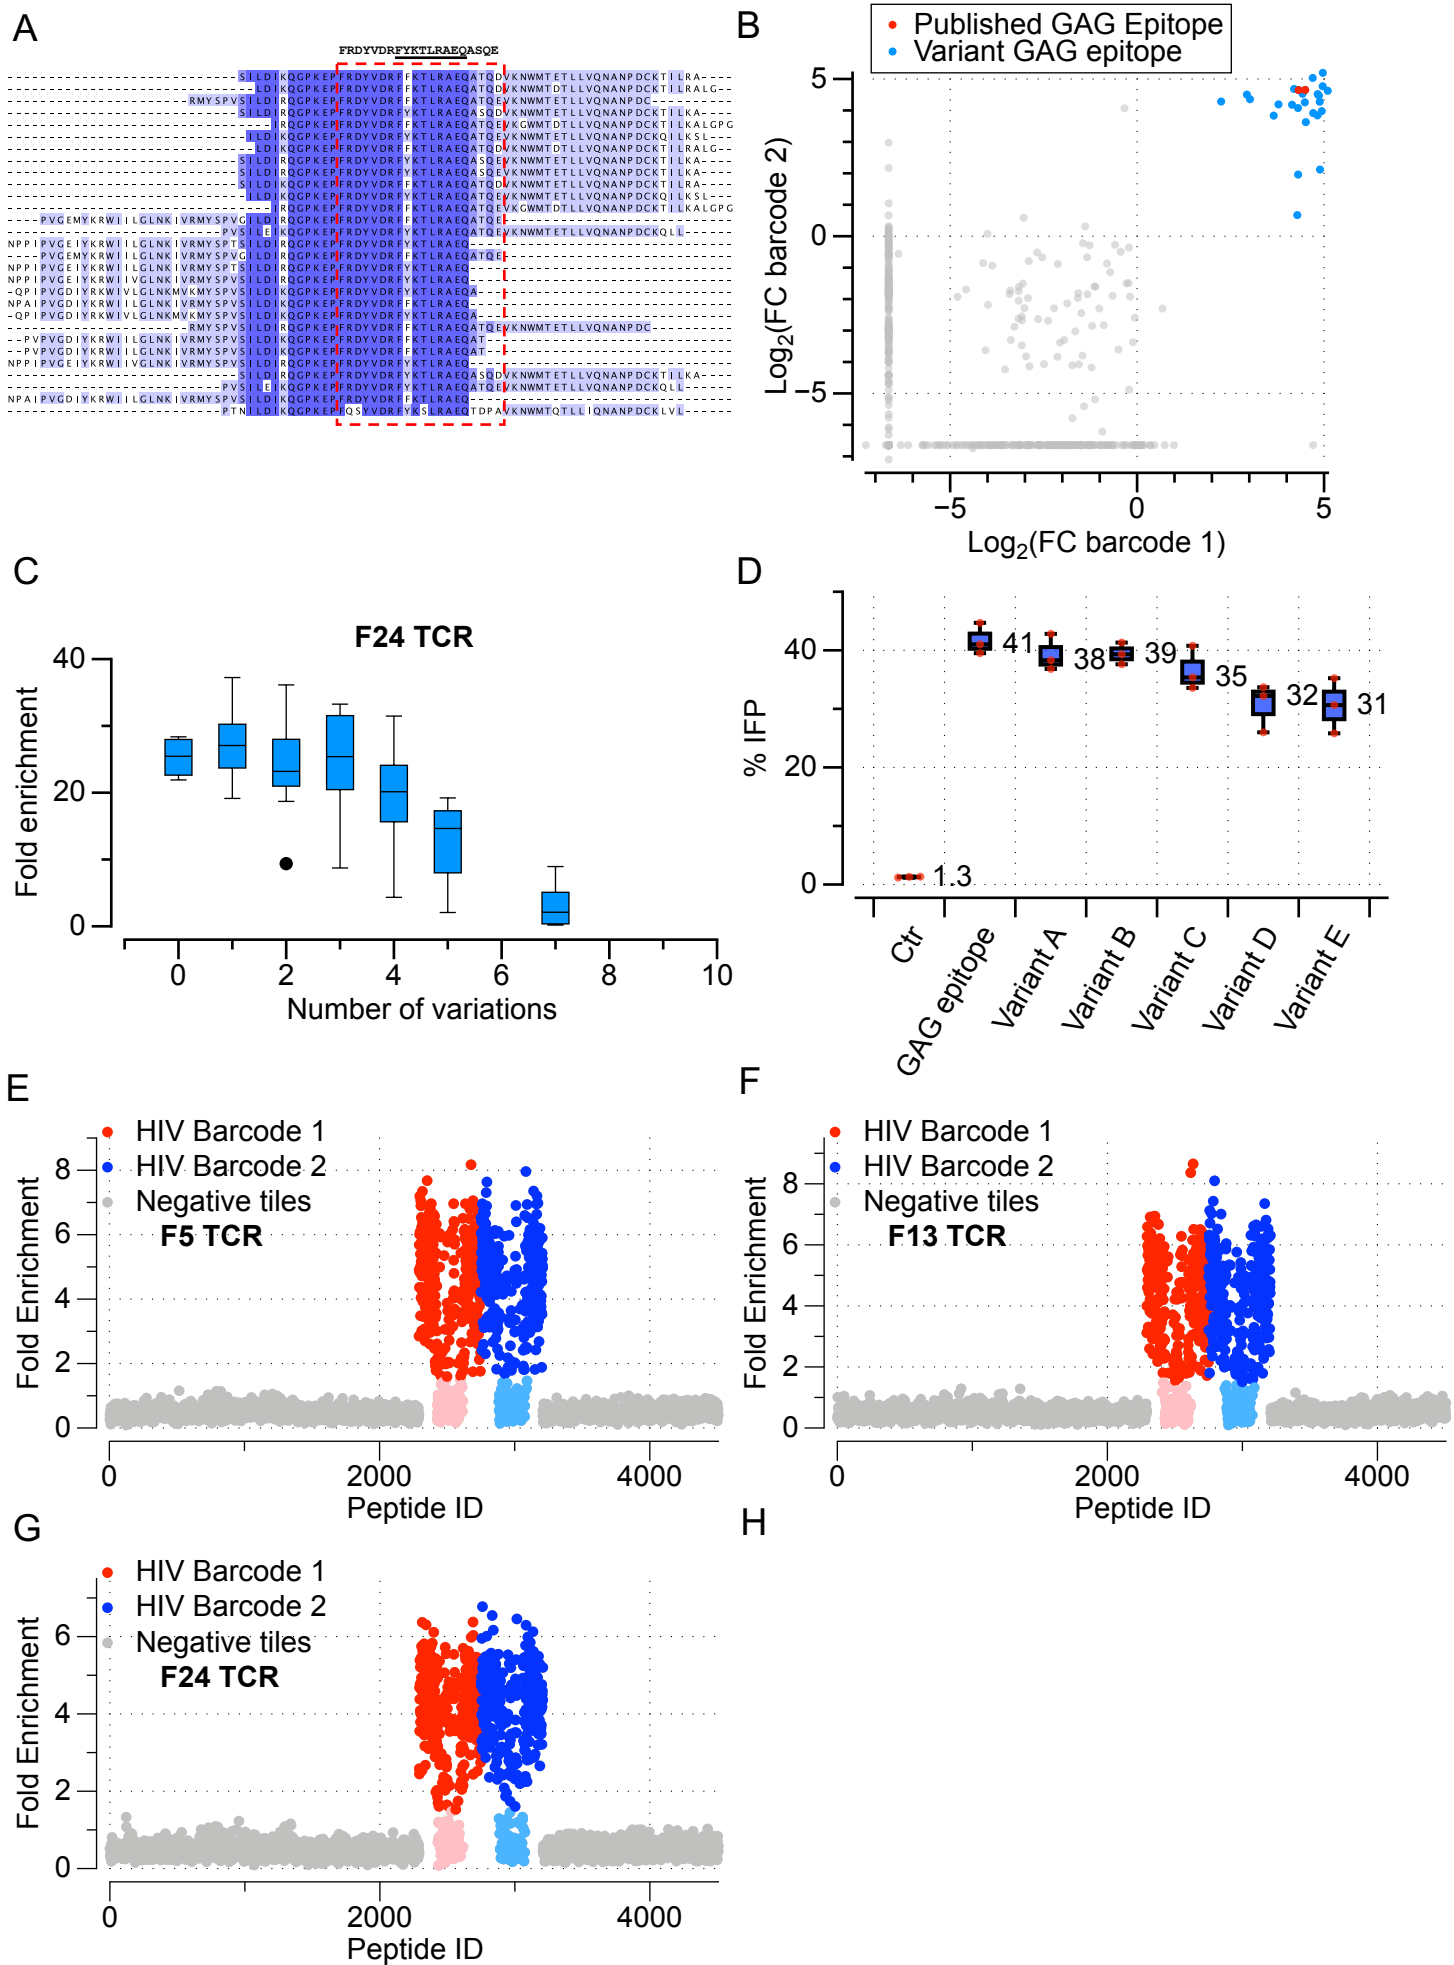

Supplement: NIHMS1947859-supplement-2.pdf [file NIHMS1947859-supplement-2.pdf]

# Supplemental Figure 3

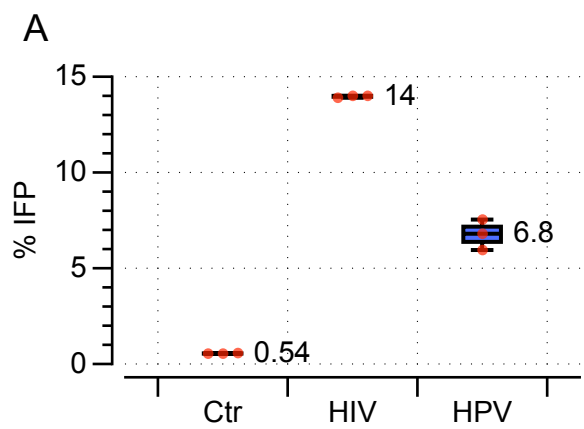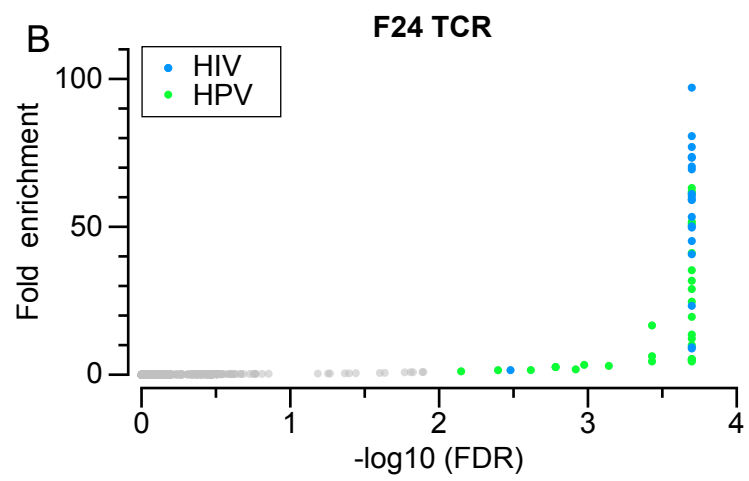

Supplement: NIHMS1947859-supplement-3.pdf [file NIHMS1947859-supplement-3.pdf]

# Supplemental Figure 4

A

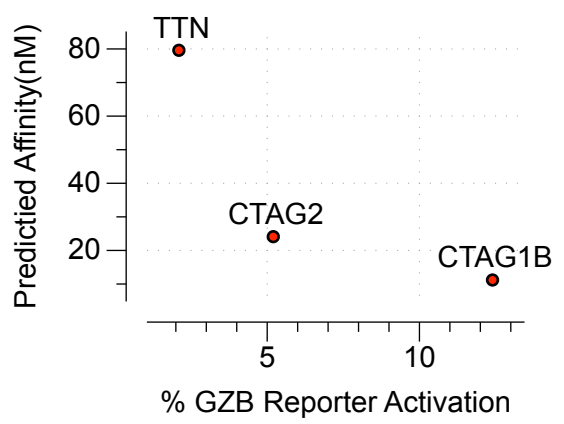

B

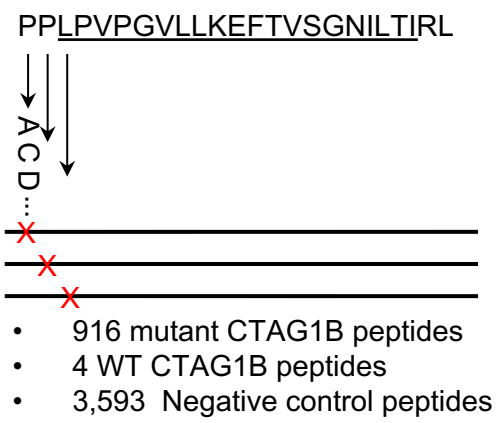

C

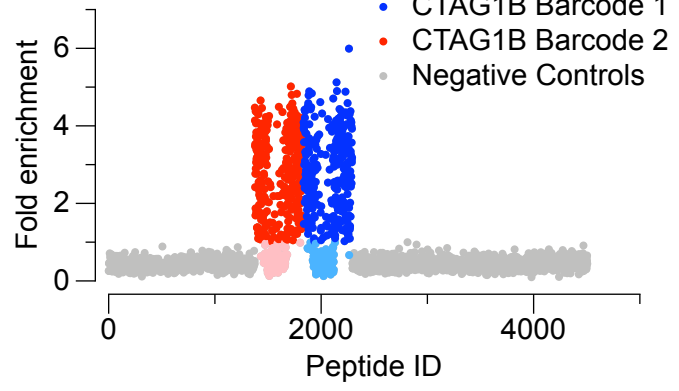

Supplement: NIHMS1947859-supplement-4.pdf [file NIHMS1947859-supplement-4.pdf]

# Supplemental Figure 5

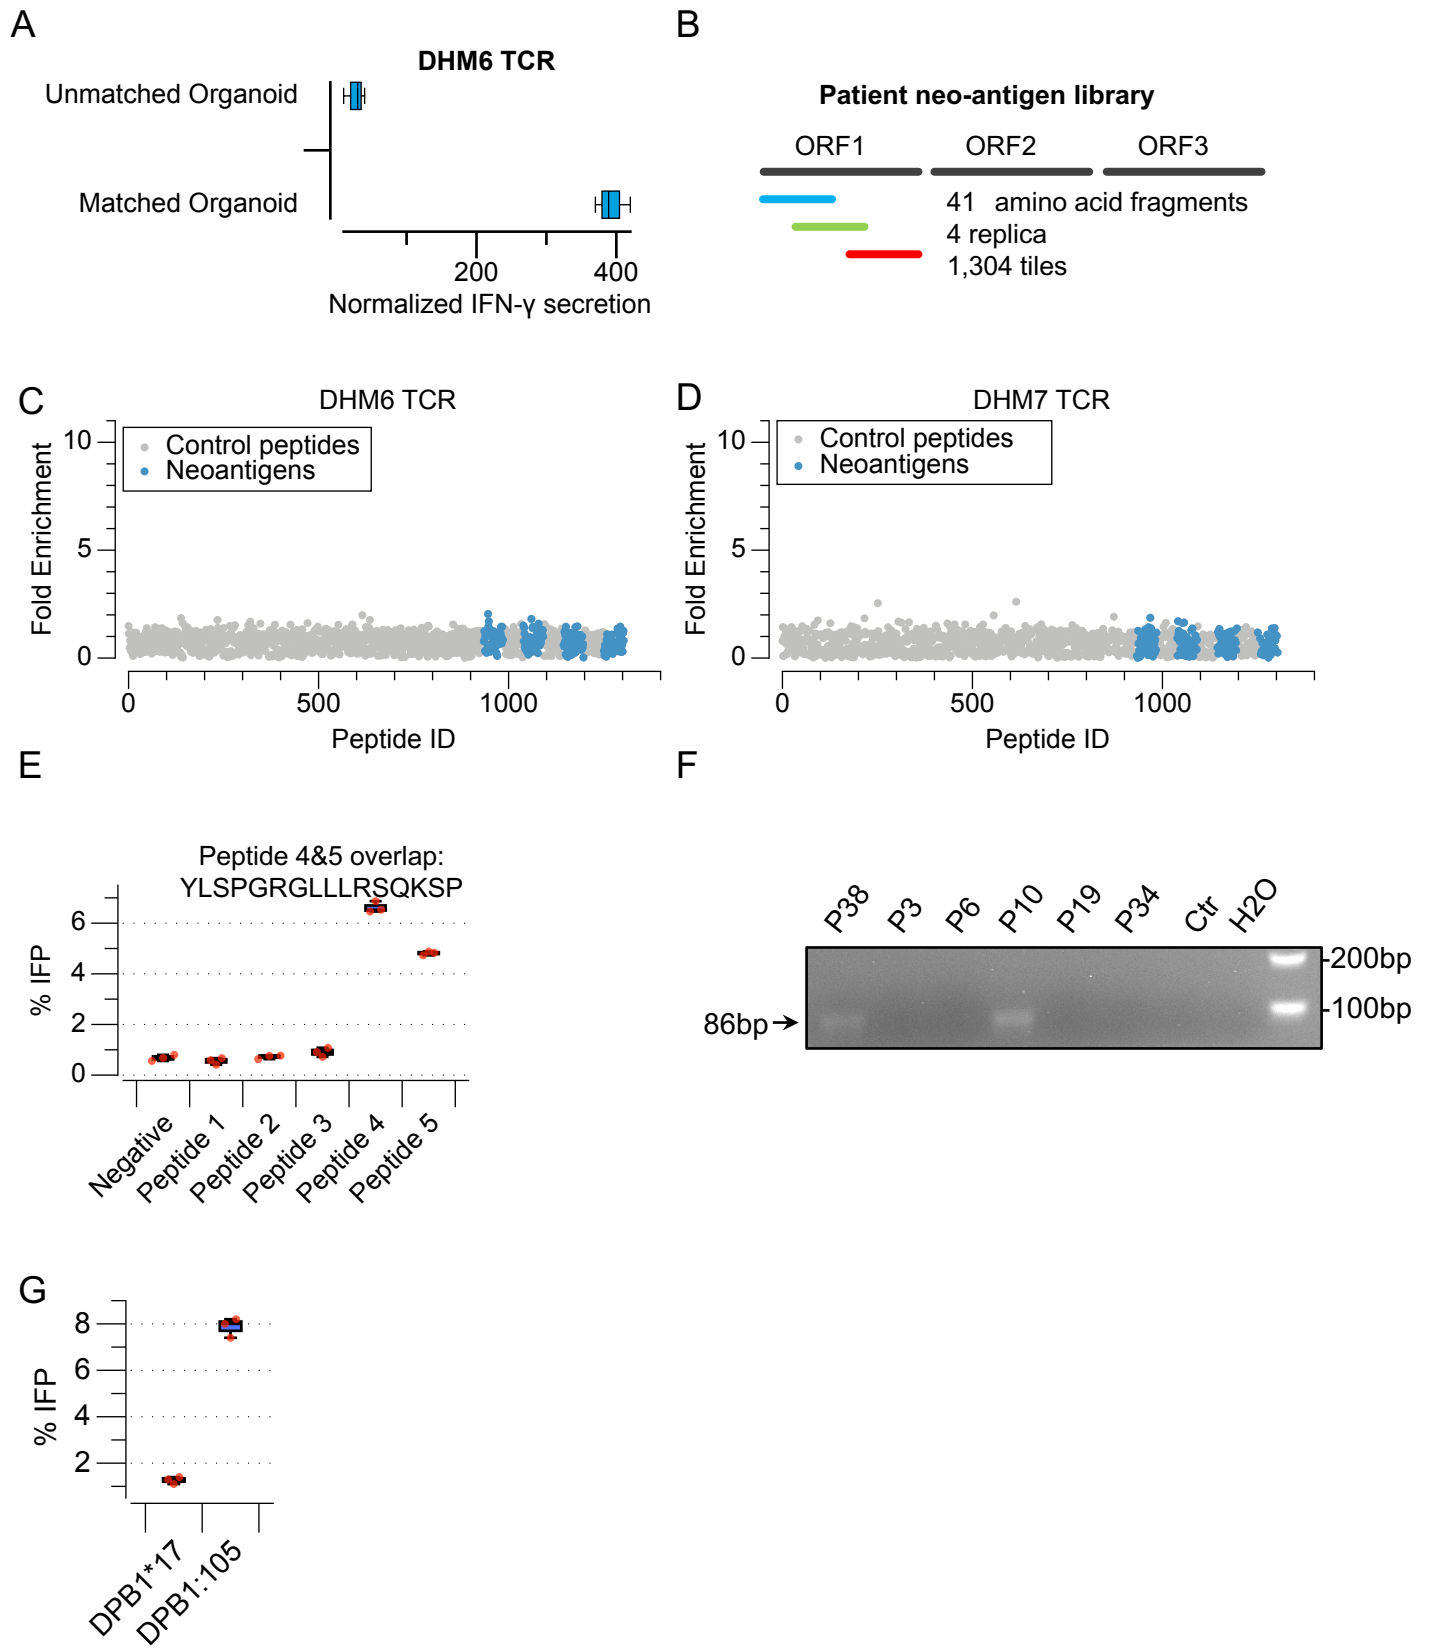

Supplement: NIHMS1947859-supplement-5.pdf [file NIHMS1947859-supplement-5.pdf]

# Supplemental Figure 6

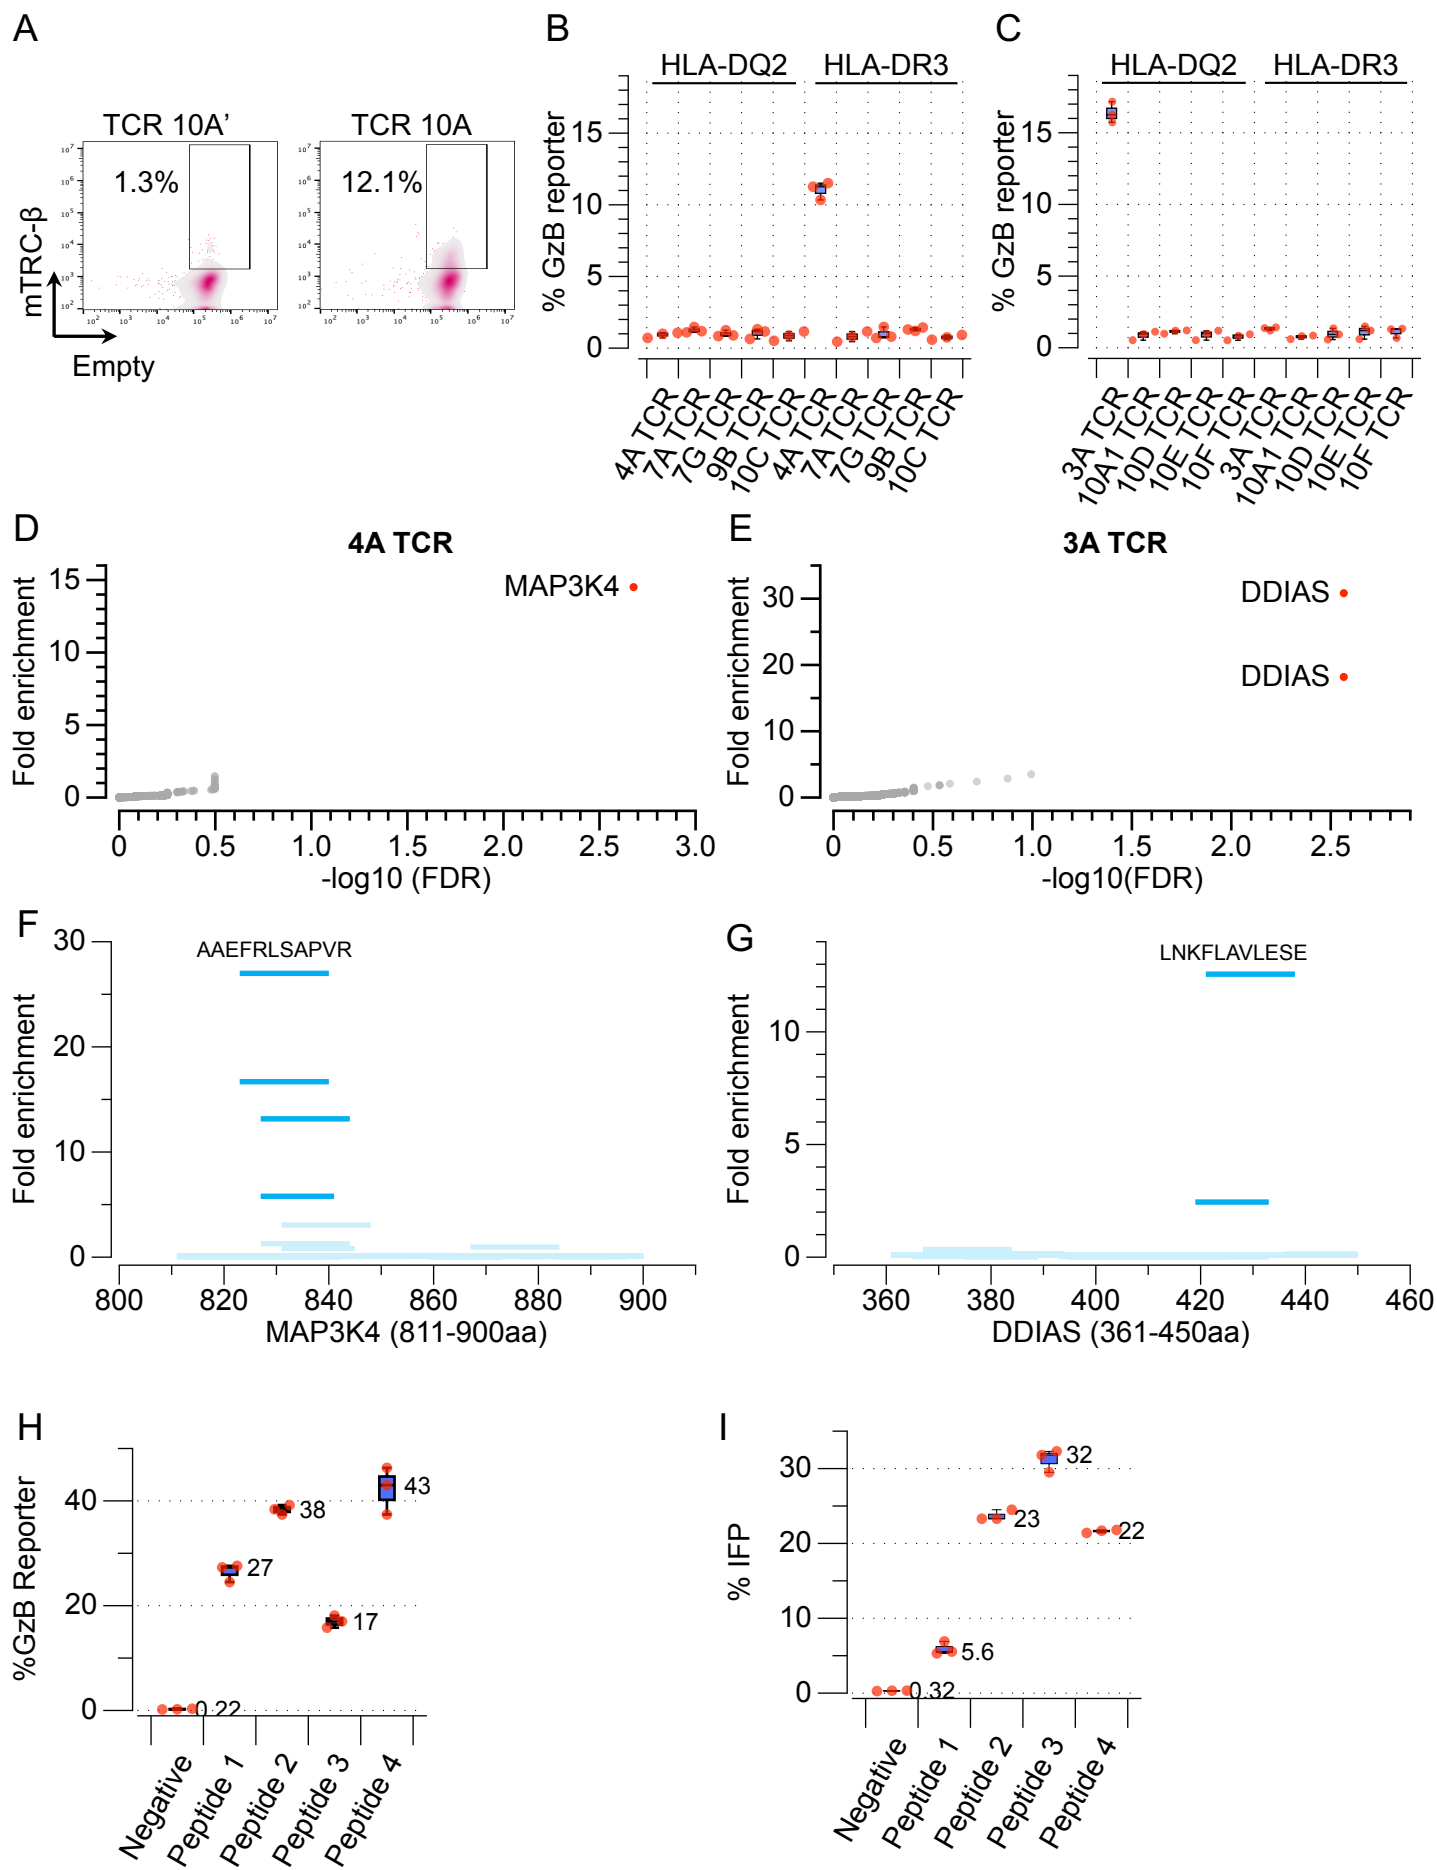

Supplement: NIHMS1947859-supplement-6.pdf [file NIHMS1947859-supplement-6.pdf]

# Supplemental Figure 7

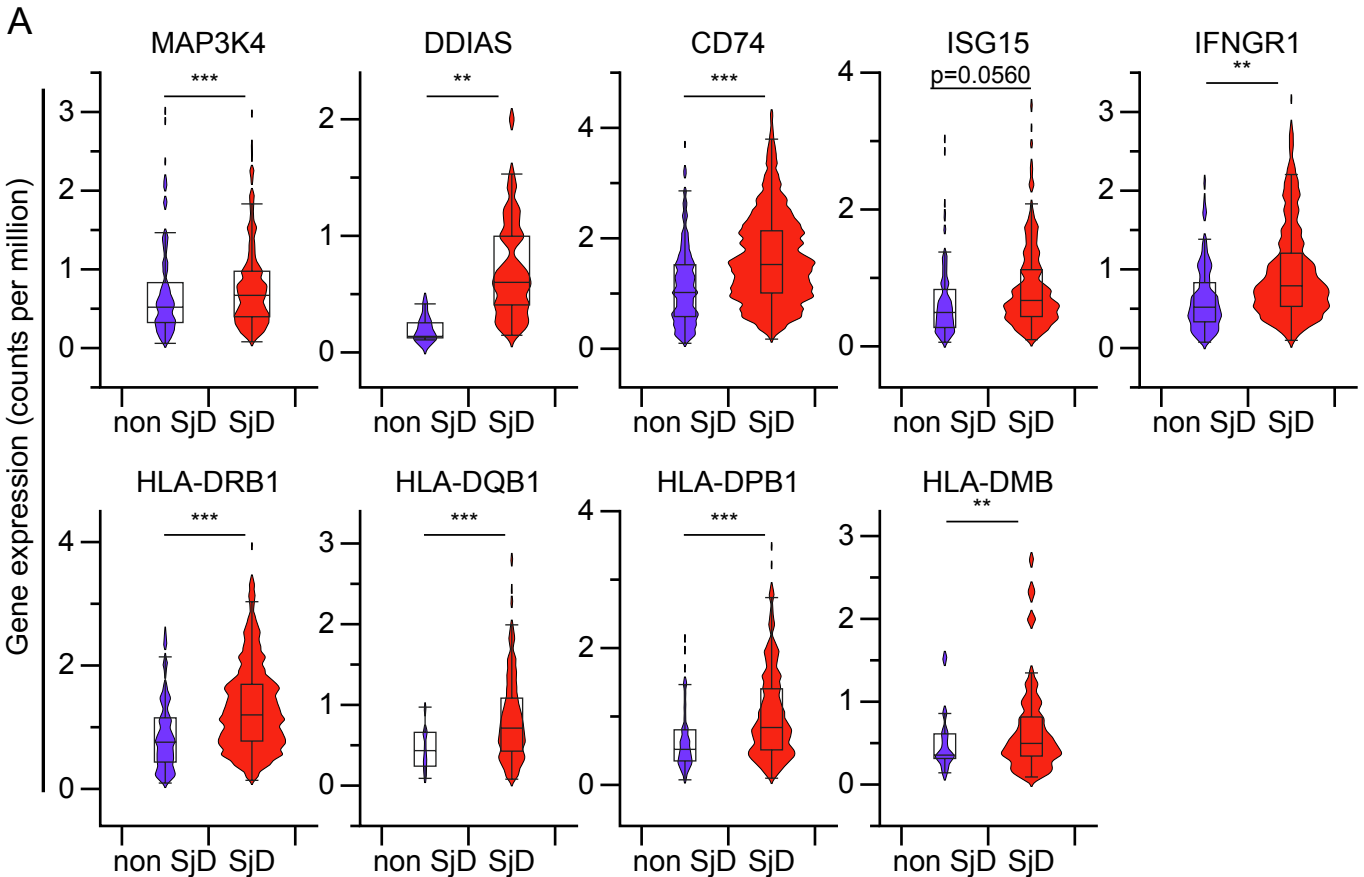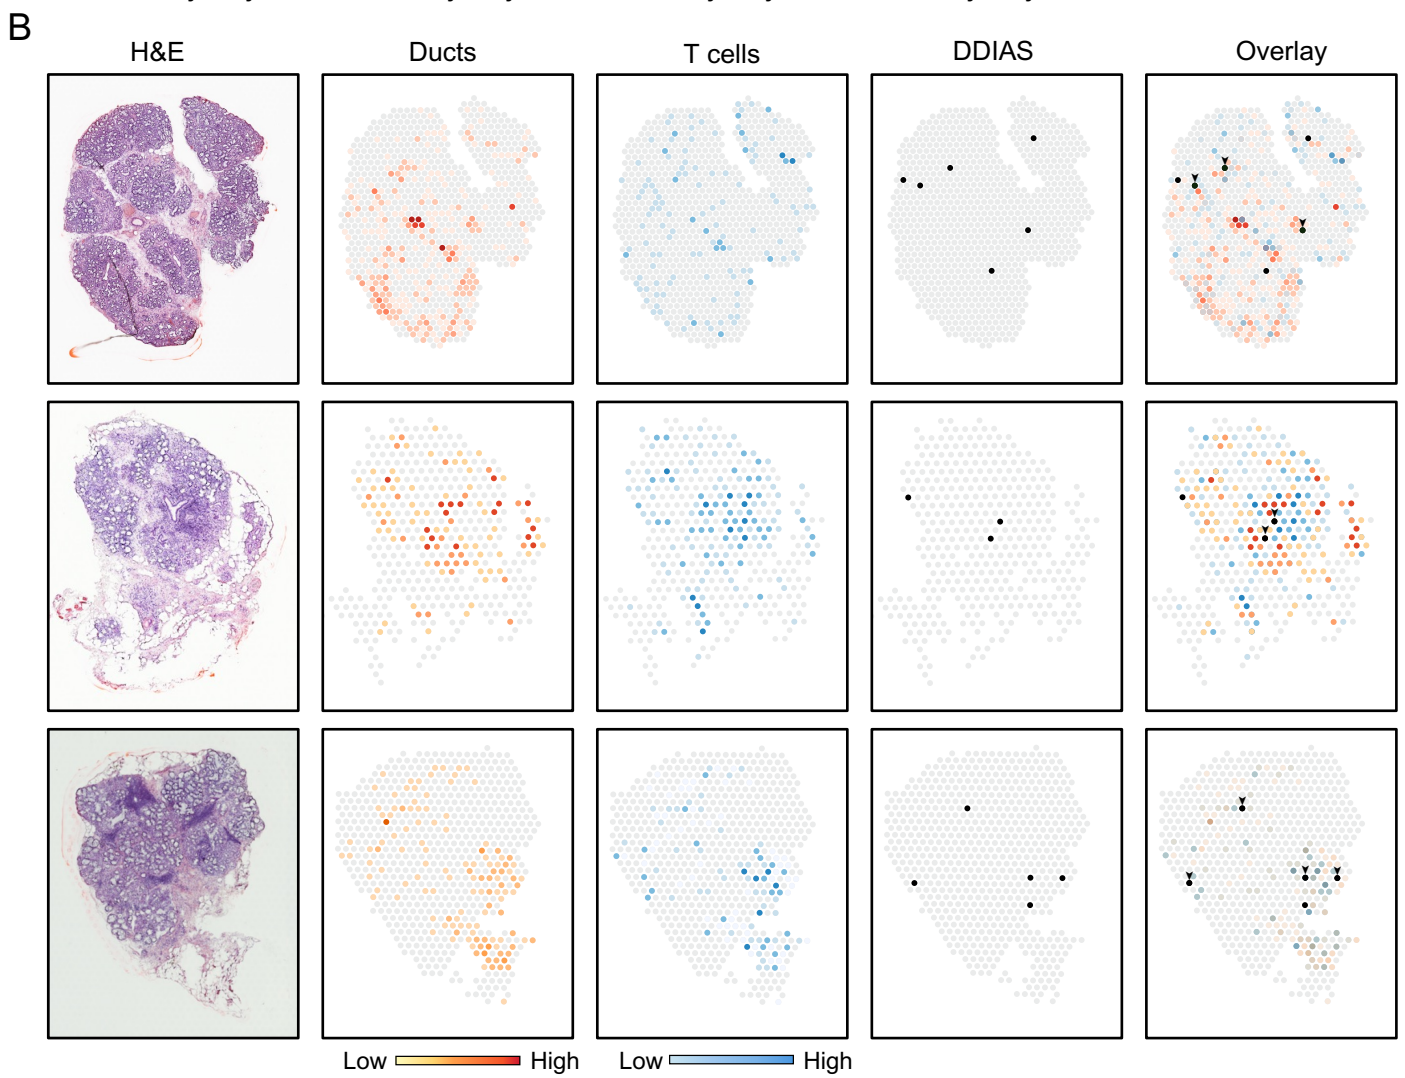

Supplement: NIHMS1947859-supplement-7.pdf [file NIHMS1947859-supplement-7.pdf]
